# Supplementary material for: Comparative Study of the Genetic Diversity of Local Steppe Cattle Breeds from Russia, Kazakhstan and Kyrgyzstan by Microsatellite Analysis of Museum and Modern Samples
Source: MDPI journal article supplement (doi:10.3390/d13080351), 2021-07-30
Supplement: s1 [file s1]

Table S2. Microsatellite genotypes of museum and modern samples used for the studies

## (a) Consensus genotypes and efficiency of genotyping of museum specimens

| Sample ID | Breed | TGLA227 |     |      |     |      |     |    |     |      | BM2113 |     |      |     |      |     |    |     |      |
|-----------|-------|---------|-----|------|-----|------|-----|----|-----|------|--------|-----|------|-----|------|-----|----|-----|------|
|           |       | A1      | A2  | +PCR | Het | Het+ | ADO | FA | Err | QI   | A1     | A2  | +PCR | Het | Het+ | ADO | FA | Err | QI   |
| H172      | KALM  | 81      | 97  | 5    | 1   | 5    | 0   | 0  | 0   | 1.00 | 135    | 135 | 5    | 0   | 0    | 0   | 0  | 0   | 1.00 |
| H210      | KALM  | 81      | 97  | 8    | 1   | 8    | 1   | 0  | 1   | 0.88 | 137    | 137 | 8    | 0   | 0    | 0   | 0  | 0   | 1.00 |
| H215      | KALM  | 93      | 95  | 5    | 1   | 5    | 0   | 0  | 0   | 1.00 | 129    | 135 | 5    | 1   | 5    | 0   | 0  | 0   | 1.00 |
| H219      | KALM  | 89      | 99  | 5    | 1   | 5    | 0   | 0  | 0   | 1.00 | 125    | 139 | 5    | 1   | 5    | 0   | 0  | 0   | 1.00 |
| H220      | KALM  | 81      | 97  | 5    | 1   | 5    | 0   | 0  | 0   | 1.00 | 127    | 137 | 5    | 1   | 5    | 0   | 0  | 0   | 1.00 |
| H221      | KALM  | 87      | 97  | 5    | 1   | 5    | 0   | 0  | 0   | 1.00 | 133    | 135 | 5    | 1   | 5    | 0   | 0  | 0   | 1.00 |
| H222      | KALM  | 81      | 93  | 5    | 1   | 5    | 0   | 0  | 0   | 1.00 | 135    | 139 | 5    | 1   | 5    | 0   | 0  | 0   | 1.00 |
| H223      | KALM  | 91      | 91  | 5    | 0   | 0    | 0   | 0  | 0   | 1.00 | 139    | 139 | 5    | 0   | 0    | 0   | 0  | 0   | 1.00 |
| H227      | KALM  | 79      | 93  | 5    | 1   | 5    | 0   | 0  | 0   | 1.00 | 127    | 135 | 5    | 1   | 5    | 0   | 0  | 0   | 1.00 |
| H231      | KALM  | 81      | 93  | 5    | 1   | 5    | 0   | 0  | 0   | 1.00 | 127    | 129 | 5    | 1   | 5    | 0   | 0  | 0   | 1.00 |
| H173      | KRGZ  | 91      | 93  | 4    | 1   | 4    | 0   | 0  | 0   | 1.00 | 127    | 137 | 5    | 1   | 5    | 0   | 0  | 0   | 1.00 |
| H175      | KRGZ  | 83      | 91  | 5    | 1   | 5    | 0   | 0  | 0   | 1.00 | 127    | 135 | 7    | 1   | 7    | 0   | 0  | 0   | 1.00 |
| H176      | KRGZ  | 77      | 91  | 4    | 1   | 4    | 0   | 0  | 0   | 1.00 | 127    | 137 | 4    | 1   | 4    | 0   | 0  | 0   | 1.00 |
| H178      | KRGZ  | 83      | 83  | 6    | 0   | 0    | 0   | 1  | 1   | 0.83 | 133    | 137 | 8    | 1   | 8    | 0   | 0  | 0   | 1.00 |
| H179      | KRGZ  | 81      | 97  | 5    | 1   | 5    | 0   | 0  | 0   | 1.00 | 135    | 139 | 5    | 1   | 5    | 0   | 0  | 0   | 1.00 |
| H180      | KRGZ  | 91      | 93  | 5    | 1   | 5    | 0   | 0  | 0   | 1.00 | 135    | 135 | 5    | 0   | 0    | 0   | 0  | 0   | 1.00 |
| H181      | KRGZ  | 81      | 81  | 5    | 0   | 0    | 0   | 0  | 0   | 1.00 | 133    | 143 | 5    | 1   | 5    | 0   | 0  | 0   | 1.00 |
| H182      | KRGZ  | 77      | 91  | 5    | 1   | 5    | 0   | 0  | 0   | 1.00 | 137    | 139 | 5    | 1   | 5    | 0   | 0  | 0   | 1.00 |
| H183      | KRGZ  | 81      | 89  | 5    | 1   | 5    | 0   | 0  | 0   | 1.00 | 137    | 137 | 5    | 0   | 0    | 0   | 0  | 0   | 1.00 |
| H184      | KRGZ  | 81      | 101 | 5    | 1   | 5    | 0   | 0  | 0   | 1.00 | 127    | 137 | 5    | 1   | 5    | 0   | 0  | 0   | 1.00 |
| H186      | KRGZ  | 87      | 97  | 5    | 1   | 5    | 0   | 0  | 0   | 1.00 | 135    | 139 | 5    | 1   | 5    | 0   | 0  | 0   | 1.00 |
| H354      | KZKH  | 89      | 91  | 5    | 1   | 5    | 0   | 0  | 0   | 1.00 | 127    | 137 | 5    | 1   | 5    | 0   | 0  | 0   | 1.00 |
| H355      | KZKH  | 95      | 97  | 8    | 1   | 8    | 0   | 0  | 0   | 1.00 | 139    | 139 | 8    | 0   | 0    | 0   | 0  | 0   | 1.00 |
| H104      | KZKH  | 81      | 97  | 5    | 1   | 5    | 0   | 0  | 0   | 1.00 | 129    | 137 | 5    | 1   | 5    | 0   | 0  | 0   | 1.00 |
| Sample ID | Breed | TGLA53  |     |      |     |      |     |    |     |      | ETH10  |     |      |     |      |     |    |     |      |
|           |       | A1      | A2  | +PCR | Het | Het+ | ADO | FA | Err | QI   | A1     | A2  | +PCR | Het | Het+ | ADO | FA | Err | QI   |
| H172      | KALM  | 170     | 170 | 4    | 0   | 0    | 0   | 0  | 0   | 1.00 | 219    | 219 | 5    | 0   | 0    | 0   | 0  | 0   | 1.00 |
| H210      | KALM  | 160     | 160 | 4    | 0   | 0    | 0   | 0  | 0   | 1.00 | 217    | 219 | 8    | 1   | 8    | 0   | 0  | 0   | 1.00 |
| H215      | KALM  | 160     | 162 | 5    | 1   | 5    | 0   | 0  | 0   | 1.00 | 217    | 219 | 5    | 1   | 5    | 0   | 0  | 0   | 1.00 |
| H219      | KALM  | 154     | 168 | 5    | 1   | 5    | 0   | 0  | 0   | 1.00 | 217    | 219 | 5    | 1   | 5    | 0   | 0  | 0   | 1.00 |
| H220      | KALM  | 172     | 176 | 5    | 1   | 5    | 0   | 0  | 0   | 1.00 | 217    | 225 | 5    | 1   | 5    | 0   | 0  | 0   | 1.00 |
| H221      | KALM  | 160     | 170 | 5    | 1   | 5    | 0   | 0  | 0   | 1.00 | 217    | 221 | 5    | 1   | 5    | 0   | 0  | 0   | 1.00 |
| H222      | KALM  | 170     | 182 | 5    | 1   | 5    | 0   | 0  | 0   | 1.00 | 219    | 219 | 5    | 0   | 0    | 0   | 1  | 1   | 0.80 |
| H223      | KALM  | 160     | 170 | 5    | 1   | 5    | 0   | 0  | 0   | 1.00 | 217    | 217 | 5    | 0   | 0    | 0   | 0  | 0   | 1.00 |
| H227      | KALM  | 160     | 168 | 5    | 1   | 5    | 0   | 0  | 0   | 1.00 | 217    | 217 | 5    | 0   | 0    | 0   | 0  | 0   | 1.00 |
| H231      | KALM  | 164     | 182 | 5    | 1   | 5    | 1   | 0  | 1   | 0.80 | 217    | 221 | 5    | 1   | 5    | 0   | 0  | 0   | 1.00 |
| H173      | KRGZ  | 154     | 168 | 5    | 1   | 5    | 1   | 0  | 1   | 0.80 | 213    | 217 | 5    | 1   | 5    | 0   | 0  | 0   | 1.00 |
| H175      | KRGZ  | 160     | 160 | 3    | 0   | 0    | 0   | 0  | 0   | 1.00 | 219    | 223 | 7    | 1   | 7    | 0   | 0  | 0   | 1.00 |
| H176      | KRGZ  |         |     |      |     |      |     |    |     |      | 217    | 217 | 4    | 0   | 0    | 0   | 0  | 0   | 1.00 |
| H178      | KRGZ  | 154     | 154 | 7    | 0   | 0    | 0   | 0  | 0   | 1.00 | 219    | 219 | 6    | 0   | 0    | 0   | 0  | 0   | 1.00 |

|           |       |        |     |      |     |      |     |    |     |      |         |     |      |     |      |     |    |     |      |
|-----------|-------|--------|-----|------|-----|------|-----|----|-----|------|---------|-----|------|-----|------|-----|----|-----|------|
| H179      | KRGZ  | 180    | 184 | 5    | 1   | 5    | 0   | 0  | 0   | 1.00 | 217     | 217 | 5    | 0   | 0    | 0   | 0  | 0   | 1.00 |
| H180      | KRGZ  |        |     |      |     |      |     |    |     |      | 223     | 225 | 5    | 1   | 5    | 0   | 0  | 0   | 1.00 |
| H181      | KRGZ  | 160    | 160 | 5    | 0   | 0    | 0   | 1  | 1   | 0.80 | 221     | 221 | 5    | 0   | 0    | 0   | 0  | 0   | 1.00 |
| H182      | KRGZ  | 160    | 164 | 5    | 1   | 5    | 0   | 0  | 0   | 1.00 | 217     | 219 | 5    | 1   | 5    | 0   | 0  | 0   | 1.00 |
| H183      | KRGZ  | 180    | 182 | 4    | 1   | 4    | 0   | 0  | 0   | 1.00 | 219     | 219 | 5    | 0   | 0    | 0   | 0  | 0   | 1.00 |
| H184      | KRGZ  | 158    | 176 | 5    | 1   | 5    | 0   | 0  | 0   | 1.00 | 217     | 219 | 5    | 1   | 5    | 0   | 0  | 0   | 1.00 |
| H186      | KRGZ  | 166    | 168 | 5    | 1   | 5    | 0   | 0  | 0   | 1.00 | 219     | 219 | 5    | 0   | 0    | 0   | 0  | 0   | 1.00 |
| H354      | KZKH  | 162    | 168 | 5    | 1   | 5    | 0   | 0  | 0   | 1.00 | 217     | 221 | 5    | 1   | 5    | 0   | 0  | 0   | 1.00 |
| H355      | KZKH  | 160    | 170 | 8    | 1   | 8    | 2   | 0  | 2   | 0.75 | 215     | 217 | 8    | 1   | 8    | 0   | 0  | 0   | 1.00 |
| H104      | KZKH  | 166    | 170 | 5    | 1   | 5    | 0   | 0  | 0   | 1.00 | 217     | 219 | 5    | 1   | 5    | 0   | 0  | 0   | 1.00 |
| Sample ID | Breed | SPS115 |     |      |     |      |     |    |     |      | TGLA122 |     |      |     |      |     |    |     |      |
|           |       | A1     | A2  | +PCR | Het | Het+ | ADO | FA | Err | QI   | A1      | A2  | +PCR | Het | Het+ | ADO | FA | Err | QI   |
| H172      | KALM  | 248    | 260 | 5    | 1   | 5    | 0   | 0  | 0   | 1.00 | 145     | 151 | 5    | 1   | 5    | 0   | 0  | 0   | 1.00 |
| H210      | KALM  | 248    | 256 | 8    | 1   | 8    | 2   | 0  | 2   | 0.75 | 143     | 143 | 8    | 0   | 0    | 0   | 2  | 2   | 0.75 |
| H215      | KALM  | 248    | 260 | 5    | 1   | 5    | 0   | 0  | 0   | 1.00 | 143     | 173 | 5    | 1   | 5    | 0   | 0  | 0   | 1.00 |
| H219      | KALM  | 256    | 256 | 5    | 0   | 0    | 0   | 0  | 0   | 1.00 | 143     | 151 | 5    | 1   | 5    | 0   | 0  | 0   | 1.00 |
| H220      | KALM  | 248    | 248 | 5    | 0   | 0    | 0   | 0  | 0   | 1.00 | 143     | 169 | 5    | 1   | 5    | 0   | 0  | 0   | 1.00 |
| H221      | KALM  | 248    | 248 | 5    | 0   | 0    | 0   | 0  | 0   | 1.00 | 143     | 169 | 5    | 1   | 5    | 0   | 0  | 0   | 1.00 |
| H222      | KALM  | 248    | 248 | 5    | 0   | 0    | 0   | 0  | 0   | 1.00 | 147     | 149 | 5    | 1   | 5    | 0   | 0  | 0   | 1.00 |
| H223      | KALM  | 248    | 254 | 5    | 1   | 5    | 0   | 0  | 0   | 1.00 | 143     | 165 | 5    | 1   | 5    | 0   | 0  | 0   | 1.00 |
| H227      | KALM  | 248    | 248 | 5    | 0   | 0    | 0   | 0  | 0   | 1.00 | 143     | 145 | 5    | 1   | 5    | 0   | 0  | 0   | 1.00 |
| H231      | KALM  | 248    | 254 | 5    | 1   | 5    | 0   | 0  | 0   | 1.00 | 151     | 161 | 5    | 1   | 5    | 0   | 0  | 0   | 1.00 |
| H173      | KRGZ  | 256    | 260 | 5    | 1   | 5    | 1   | 0  | 1   | 0.80 | 151     | 151 | 5    | 0   | 0    | 0   | 0  | 0   | 1.00 |
| H175      | KRGZ  | 254    | 256 | 7    | 1   | 7    | 1   | 0  | 1   | 0.86 | 141     | 153 | 7    | 1   | 7    | 0   | 0  | 0   | 1.00 |
| H176      | KRGZ  | 256    | 260 | 4    | 1   | 4    | 0   | 0  | 0   | 1.00 | 143     | 169 | 4    | 1   | 4    | 0   | 0  | 0   | 1.00 |
| H178      | KRGZ  | 248    | 248 | 5    | 0   | 0    | 0   | 1  | 1   | 0.80 | 167     | 169 | 4    | 1   | 4    | 1   | 0  | 1   | 0.75 |
| H179      | KRGZ  | 248    | 256 | 5    | 1   | 5    | 0   | 0  | 0   | 1.00 | 143     | 169 | 5    | 1   | 5    | 0   | 0  | 0   | 1.00 |
| H180      | KRGZ  | 252    | 260 | 5    | 1   | 5    | 0   | 0  | 0   | 1.00 | 141     | 151 | 5    | 1   | 5    | 0   | 0  | 0   | 1.00 |
| H181      | KRGZ  | 248    | 248 | 5    | 0   | 0    | 0   | 0  | 0   | 1.00 | 137     | 151 | 5    | 1   | 5    | 1   | 0  | 1   | 0.80 |
| H182      | KRGZ  | 248    | 254 | 5    | 1   | 5    | 0   | 0  | 0   | 1.00 | 151     | 153 | 5    | 1   | 5    | 0   | 0  | 0   | 1.00 |
| H183      | KRGZ  | 248    | 260 | 5    | 1   | 5    | 0   | 0  | 0   | 1.00 | 151     | 153 | 5    | 1   | 5    | 0   | 0  | 0   | 1.00 |
| H184      | KRGZ  | 254    | 254 | 5    | 0   | 0    | 0   | 0  | 0   | 1.00 | 143     | 169 | 5    | 1   | 5    | 0   | 0  | 0   | 1.00 |
| H186      | KRGZ  | 252    | 252 | 5    | 0   | 0    | 0   | 0  | 0   | 1.00 | 137     | 161 | 5    | 1   | 5    | 0   | 0  | 0   | 1.00 |
| H354      | KZKH  | 248    | 248 | 5    | 0   | 0    | 0   | 0  | 0   | 1.00 | 147     | 151 | 5    | 1   | 5    | 0   | 0  | 0   | 1.00 |
| H355      | KZKH  | 248    | 248 | 8    | 0   | 0    | 0   | 0  | 0   | 1.00 | 143     | 157 | 8    | 1   | 8    | 2   | 0  | 2   | 0.75 |
| H104      | KZKH  | 248    | 256 | 5    | 1   | 5    | 0   | 0  | 0   | 1.00 | 143     | 173 | 5    | 1   | 5    | 0   | 0  | 0   | 1.00 |
| Sample ID | Breed | INRA23 |     |      |     |      |     |    |     |      | TGLA126 |     |      |     |      |     |    |     |      |
|           |       | A1     | A2  | +PCR | Het | Het+ | ADO | FA | Err | QI   | A1      | A2  | +PCR | Het | Het+ | ADO | FA | Err | QI   |
| H172      | KALM  | 208    | 208 | 5    | 0   | 0    | 0   | 0  | 0   | 1.00 | 115     | 121 | 5    | 1   | 5    | 0   | 0  | 0   | 1.00 |
| H210      | KALM  | 208    | 208 | 7    | 0   | 0    | 0   | 0  | 0   | 1.00 |         |     |      |     |      |     |    |     |      |
| H215      | KALM  | 208    | 208 | 5    | 0   | 0    | 0   | 0  | 0   | 1.00 | 117     | 123 | 5    | 1   | 5    | 0   | 0  | 0   | 1.00 |
| H219      | KALM  | 214    | 214 | 5    | 0   | 0    | 0   | 0  | 0   | 1.00 | 111     | 115 | 5    | 1   | 5    | 0   | 0  | 0   | 1.00 |
| H220      | KALM  | 206    | 212 | 5    | 1   | 5    | 0   | 0  | 0   | 1.00 | 115     | 121 | 5    | 1   | 5    | 1   | 0  | 1   | 0.80 |
| H221      | KALM  | 198    | 214 | 5    | 1   | 5    | 0   | 0  | 0   | 1.00 | 117     | 117 | 5    | 0   | 0    | 0   | 0  | 0   | 1.00 |
| H222      | KALM  | 206    | 214 | 5    | 1   | 5    | 0   | 0  | 0   | 1.00 | 115     | 117 | 5    | 1   | 5    | 0   | 0  | 0   | 1.00 |

|           |       |        |     |      |     |      |     |    |     |      |        |     |      |     |      |     |    |     |      |
|-----------|-------|--------|-----|------|-----|------|-----|----|-----|------|--------|-----|------|-----|------|-----|----|-----|------|
| H223      | KALM  | 214    | 214 | 5    | 0   | 0    | 0   | 0  | 0   | 1.00 | 117    | 117 | 5    | 0   | 0    | 0   | 0  | 0   | 1.00 |
| H227      | KALM  | 200    | 216 | 5    | 1   | 5    | 0   | 0  | 0   | 1.00 | 115    | 123 | 5    | 1   | 5    | 0   | 0  | 0   | 1.00 |
| H231      | KALM  | 206    | 206 | 5    | 0   | 0    | 0   | 0  | 0   | 1.00 | 115    | 117 | 5    | 1   | 5    | 0   | 0  | 0   | 1.00 |
| H173      | KRGZ  | 200    | 208 | 5    | 1   | 5    | 0   | 0  | 0   | 1.00 | 115    | 123 | 5    | 1   | 5    | 1   | 0  | 1   | 0.80 |
| H175      | KRGZ  | 206    | 212 | 7    | 1   | 7    | 1   | 0  | 1   | 0.86 | 115    | 123 | 7    | 1   | 7    | 0   | 0  | 0   | 1.00 |
| H176      | KRGZ  | 208    | 210 | 4    | 1   | 4    | 0   | 0  | 0   | 1.00 | 117    | 123 | 3    | 1   | 3    | 0   | 0  | 0   | 1.00 |
| H178      | KRGZ  |        |     |      |     |      |     |    |     |      | 115    | 115 | 6    | 0   | 0    | 0   | 0  | 0   | 1.00 |
| H179      | KRGZ  | 208    | 212 | 5    | 1   | 5    | 0   | 0  | 0   | 1.00 | 115    | 117 | 5    | 1   | 5    | 0   | 0  | 0   | 1.00 |
| H180      | KRGZ  | 206    | 216 | 5    | 1   | 5    | 0   | 0  | 0   | 1.00 | 117    | 117 | 5    | 0   | 0    | 0   | 0  | 0   | 1.00 |
| H181      | KRGZ  | 202    | 214 | 5    | 1   | 5    | 0   | 0  | 0   | 1.00 | 117    | 117 | 5    | 0   | 0    | 0   | 0  | 0   | 1.00 |
| H182      | KRGZ  | 206    | 208 | 5    | 1   | 5    | 0   | 0  | 0   | 1.00 | 113    | 117 | 5    | 1   | 5    | 0   | 0  | 0   | 1.00 |
| H183      | KRGZ  | 206    | 208 | 5    | 1   | 5    | 0   | 0  | 0   | 1.00 | 107    | 123 | 5    | 1   | 5    | 0   | 0  | 0   | 1.00 |
| H184      | KRGZ  | 208    | 214 | 5    | 1   | 5    | 0   | 0  | 0   | 1.00 | 117    | 117 | 5    | 0   | 0    | 0   | 0  | 0   | 1.00 |
| H186      | KRGZ  | 212    | 214 | 5    | 1   | 5    | 0   | 0  | 0   | 1.00 | 121    | 121 | 5    | 0   | 0    | 0   | 0  | 0   | 1.00 |
| H354      | KZKH  | 198    | 200 | 5    | 1   | 5    | 0   | 0  | 0   | 1.00 | 115    | 117 | 5    | 1   | 5    | 0   | 0  | 0   | 1.00 |
| H355      | KZKH  | 206    | 206 | 8    | 0   | 0    | 0   | 0  | 0   | 1.00 | 115    | 121 | 8    | 1   | 8    | 0   | 0  | 0   | 1.00 |
| H104      | KZKH  | 198    | 204 | 5    | 1   | 5    | 0   | 0  | 0   | 1.00 | 115    | 121 | 5    | 1   | 5    | 0   | 0  | 0   | 1.00 |
| Sample ID | Breed | BM1818 |     |      |     |      |     |    |     |      | ETH225 |     |      |     |      |     |    |     |      |
|           |       | A1     | A2  | +PCR | Het | Het+ | ADO | FA | Err | QI   | A1     | A2  | +PCR | Het | Het+ | ADO | FA | Err | QI   |
| H172      | KALM  | 266    | 266 | 3    | 0   | 0    | 0   | 0  | 0   | 1.00 | 146    | 150 | 5    | 1   | 5    | 0   | 0  | 0   | 1.00 |
| H210      | KALM  | 260    | 260 | 4    | 0   | 0    | 0   | 1  | 1   | 0.75 | 150    | 150 | 7    | 0   | 0    | 0   | 0  | 0   | 1.00 |
| H215      | KALM  | 256    | 262 | 5    | 1   | 5    | 0   | 0  | 0   | 1.00 | 148    | 150 | 5    | 1   | 5    | 0   | 0  | 0   | 1.00 |
| H219      | KALM  | 262    | 266 | 5    | 1   | 5    | 0   | 0  | 0   | 1.00 | 144    | 144 | 5    | 0   | 0    | 0   | 0  | 0   | 1.00 |
| H220      | KALM  | 268    | 270 | 5    | 1   | 5    | 0   | 0  | 0   | 1.00 | 158    | 158 | 5    | 0   | 0    | 0   | 0  | 0   | 1.00 |
| H221      | KALM  | 264    | 266 | 5    | 1   | 5    | 0   | 0  | 0   | 1.00 | 144    | 152 | 5    | 1   | 5    | 0   | 0  | 0   | 1.00 |
| H222      | KALM  | 262    | 266 | 5    | 1   | 5    | 0   | 0  | 0   | 1.00 | 146    | 150 | 5    | 1   | 5    | 0   | 0  | 0   | 1.00 |
| H223      | KALM  | 262    | 262 | 5    | 0   | 0    | 0   | 0  | 0   | 1.00 | 140    | 148 | 5    | 1   | 5    | 0   | 0  | 0   | 1.00 |
| H227      | KALM  | 262    | 262 | 5    | 0   | 0    | 0   | 0  | 0   | 1.00 | 144    | 150 | 5    | 1   | 5    | 0   | 0  | 0   | 1.00 |
| H231      | KALM  | 262    | 266 | 5    | 1   | 5    | 0   | 0  | 0   | 1.00 | 150    | 150 | 5    | 0   | 0    | 0   | 0  | 0   | 1.00 |
| H173      | KRGZ  | 266    | 266 | 5    | 0   | 0    | 0   | 0  | 0   | 1.00 | 148    | 148 | 5    | 0   | 0    | 0   | 0  | 0   | 1.00 |
| H175      | KRGZ  | 262    | 266 | 4    | 1   | 4    | 0   | 1  | 1   | 0.75 | 144    | 148 | 7    | 1   | 7    | 0   | 0  | 0   | 1.00 |
| H176      | KRGZ  | 262    | 266 | 4    | 1   | 4    | 0   | 0  | 0   | 1.00 | 148    | 150 | 4    | 1   | 4    | 0   | 0  | 0   | 1.00 |
| H178      | KRGZ  |        |     |      |     |      |     |    |     |      | 144    | 150 | 6    | 1   | 6    | 1   | 0  | 1   | 0.83 |
| H179      | KRGZ  | 266    | 266 | 5    | 0   | 0    | 0   | 0  | 0   | 1.00 | 146    | 148 | 5    | 1   | 5    | 0   | 0  | 0   | 1.00 |
| H180      | KRGZ  |        |     |      |     |      |     |    |     |      | 144    | 148 | 5    | 1   | 5    | 0   | 0  | 0   | 1.00 |
| H181      | KRGZ  |        |     |      |     |      |     |    |     |      | 144    | 150 | 5    | 1   | 5    | 0   | 0  | 0   | 1.00 |
| H182      | KRGZ  | 262    | 266 | 5    | 1   | 5    | 0   | 0  | 0   | 1.00 | 144    | 144 | 5    | 0   | 0    | 0   | 0  | 0   | 1.00 |
| H183      | KRGZ  | 266    | 274 | 5    | 1   | 5    | 1   | 0  | 1   | 0.80 | 144    | 150 | 5    | 1   | 5    | 0   | 0  | 0   | 1.00 |
| H184      | KRGZ  | 262    | 266 | 5    | 1   | 5    | 0   | 0  | 0   | 1.00 | 148    | 150 | 5    | 1   | 5    | 0   | 0  | 0   | 1.00 |
| H186      | KRGZ  | 262    | 266 | 5    | 1   | 5    | 0   | 0  | 0   | 1.00 | 144    | 144 | 5    | 0   | 0    | 0   | 0  | 0   | 1.00 |
| H354      | KZKH  | 266    | 268 | 4    | 1   | 4    | 0   | 0  | 0   | 1.00 | 144    | 144 | 5    | 0   | 0    | 0   | 0  | 0   | 1.00 |
| H355      | KZKH  |        |     |      |     |      |     |    |     |      | 144    | 150 | 8    | 1   | 8    | 1   | 0  | 1   | 0.88 |
| H104      | KZKH  | 262    | 266 | 5    | 1   | 5    | 0   | 0  | 0   | 1.00 | 144    | 144 | 5    | 0   | 0    | 0   | 0  | 0   | 1.00 |
| Sample ID | Breed | BM1824 |     |      |     |      |     |    |     |      |        |     |      |     |      |     |    |     |      |
|           |       | A1     | A2  | +PCR | Het | Het+ | ADO | FA | Err | QI   |        |     |      |     |      |     |    |     |      |

|      |      |     |     |   |   |   |   |   |   |      |  |  |  |  |  |  |  |  |
|------|------|-----|-----|---|---|---|---|---|---|------|--|--|--|--|--|--|--|--|
| H172 | KALM | 188 | 188 | 5 | 0 | 0 | 0 | 0 | 0 | 1.00 |  |  |  |  |  |  |  |  |
| H210 | KALM | 182 | 182 | 7 | 0 | 0 | 0 | 0 | 0 | 1.00 |  |  |  |  |  |  |  |  |
| H215 | KALM | 182 | 182 | 5 | 0 | 0 | 0 | 0 | 0 | 1.00 |  |  |  |  |  |  |  |  |
| H219 | KALM | 182 | 182 | 5 | 0 | 0 | 0 | 0 | 0 | 1.00 |  |  |  |  |  |  |  |  |
| H220 | KALM | 178 | 180 | 5 | 1 | 5 | 0 | 0 | 0 | 1.00 |  |  |  |  |  |  |  |  |
| H221 | KALM | 178 | 180 | 5 | 1 | 5 | 0 | 0 | 0 | 1.00 |  |  |  |  |  |  |  |  |
| H222 | KALM | 182 | 188 | 5 | 1 | 5 | 0 | 0 | 0 | 1.00 |  |  |  |  |  |  |  |  |
| H223 | KALM | 178 | 182 | 5 | 1 | 5 | 0 | 0 | 0 | 1.00 |  |  |  |  |  |  |  |  |
| H227 | KALM | 180 | 182 | 5 | 1 | 5 | 0 | 0 | 0 | 1.00 |  |  |  |  |  |  |  |  |
| H231 | KALM | 180 | 188 | 5 | 1 | 5 | 0 | 0 | 0 | 1.00 |  |  |  |  |  |  |  |  |
| H173 | KRGZ | 188 | 188 | 5 | 0 | 0 | 0 | 0 | 0 | 1.00 |  |  |  |  |  |  |  |  |
| H175 | KRGZ | 180 | 182 | 7 | 1 | 7 | 0 | 0 | 0 | 1.00 |  |  |  |  |  |  |  |  |
| H176 | KRGZ | 182 | 182 | 4 | 0 | 0 | 0 | 0 | 0 | 1.00 |  |  |  |  |  |  |  |  |
| H178 | KRGZ | 182 | 182 | 8 | 0 | 0 | 0 | 0 | 0 | 1.00 |  |  |  |  |  |  |  |  |
| H179 | KRGZ | 178 | 182 | 5 | 1 | 5 | 0 | 0 | 0 | 1.00 |  |  |  |  |  |  |  |  |
| H180 | KRGZ | 180 | 182 | 5 | 1 | 5 | 0 | 0 | 0 | 1.00 |  |  |  |  |  |  |  |  |
| H181 | KRGZ | 180 | 182 | 5 | 1 | 5 | 0 | 0 | 0 | 1.00 |  |  |  |  |  |  |  |  |
| H182 | KRGZ | 182 | 182 | 5 | 0 | 0 | 0 | 0 | 0 | 1.00 |  |  |  |  |  |  |  |  |
| H183 | KRGZ | 180 | 182 | 5 | 1 | 5 | 0 | 0 | 0 | 1.00 |  |  |  |  |  |  |  |  |
| H184 | KRGZ | 182 | 182 | 5 | 0 | 0 | 0 | 0 | 0 | 1.00 |  |  |  |  |  |  |  |  |
| H186 | KRGZ | 188 | 188 | 5 | 0 | 0 | 0 | 0 | 0 | 1.00 |  |  |  |  |  |  |  |  |
| H354 | KZKH | 180 | 182 | 5 | 1 | 5 | 0 | 0 | 0 | 1.00 |  |  |  |  |  |  |  |  |
| H355 | KZKH | 178 | 180 | 8 | 1 | 8 | 0 | 0 | 0 | 1.00 |  |  |  |  |  |  |  |  |
| H104 | KZKH | 178 | 188 | 5 | 1 | 5 | 0 | 0 | 0 | 1.00 |  |  |  |  |  |  |  |  |

Notes: Sample ID - individual number of sample, breeds: KALM – Kalmyk, KRGZ – Kyrgyz, KZKH – Kazakh, A1 – allele 1, A2 – allele 2, +PCR - number of positive PCRs, Het – heterozygous genotypes (1 – yes, 0 – no), Het+ - the number of positive PCRs with heterozygous genotypes, ADO – the number of positive PCRs with allelic drop-out, FA - the number of positive PCRs with false allele, Err – the number of positive PCRs with error genotypes, QI - quality indices.

**(b) Microsatellite genotypes of modern specimens**

| ID      | POP    | TGLA<br>227 |    | BM<br>2113 |     | TGLA<br>53 |     | ETH<br>10 |     | SPS<br>115 |     | TGLA<br>122 |     | INRA<br>23 |     | TGLA<br>126 |     | BM<br>1818 |     | ETH<br>225 |     | BM<br>1824 |     |
|---------|--------|-------------|----|------------|-----|------------|-----|-----------|-----|------------|-----|-------------|-----|------------|-----|-------------|-----|------------|-----|------------|-----|------------|-----|
| KALM 1  | KALM_M | 87          | 97 | 135        | 143 | 160        | 160 | 215       | 219 | 248        | 260 | 169         | 169 | 202        | 202 | 117         | 121 | 266        | 266 | 150        | 150 | 182        | 182 |
| KALM 2  | KALM_M | 89          | 93 | 135        | 139 | 164        | 164 | 213       | 219 | 248        | 248 | 143         | 151 | 206        | 214 | 117         | 119 | 262        | 262 | 140        | 150 | 182        | 188 |
| KALM 3  | KALM_M | 79          | 91 | 139        | 143 | 162        | 170 | 219       | 221 | 248        | 248 | 149         | 161 | 210        | 214 | 115         | 115 | 258        | 262 | 140        | 144 | 182        | 186 |
| KALM 4  | KALM_M | 87          | 93 | 135        | 137 | 0          | 0   | 217       | 219 | 256        | 260 | 151         | 151 | 212        | 214 | 121         | 123 | 264        | 268 | 140        | 150 | 182        | 182 |
| KALM 5  | KALM_M | 75          | 91 | 137        | 141 | 162        | 172 | 219       | 223 | 252        | 256 | 143         | 145 | 206        | 210 | 117         | 121 | 266        | 268 | 140        | 150 | 180        | 180 |
| KALM 6  | KALM_M | 77          | 83 | 137        | 141 | 186        | 186 | 221       | 221 | 248        | 248 | 151         | 161 | 198        | 206 | 0           | 0   | 262        | 268 | 150        | 150 | 182        | 182 |
| KALM 7  | KALM_M | 79          | 87 | 135        | 139 | 164        | 164 | 213       | 217 | 248        | 254 | 143         | 151 | 206        | 218 | 121         | 123 | 262        | 266 | 144        | 148 | 182        | 188 |
| KALM 8  | KALM_M | 97          | 99 | 139        | 141 | 164        | 164 | 217       | 219 | 256        | 256 | 151         | 161 | 206        | 208 | 119         | 121 | 262        | 266 | 148        | 150 | 182        | 182 |
| KALM 9  | KALM_M | 77          | 91 | 133        | 137 | 154        | 154 | 219       | 221 | 260        | 260 | 143         | 143 | 208        | 208 | 115         | 117 | 258        | 258 | 144        | 148 | 182        | 182 |
| KALM 10 | KALM_M | 79          | 89 | 125        | 135 | 156        | 160 | 217       | 219 | 248        | 260 | 145         | 151 | 206        | 208 | 115         | 123 | 262        | 262 | 148        | 148 | 182        | 182 |
| KALM 11 | KALM_M | 93          | 97 | 135        | 139 | 160        | 160 | 217       | 217 | 248        | 260 | 153         | 169 | 206        | 208 | 115         | 123 | 262        | 266 | 148        | 148 | 180        | 182 |
| KALM 12 | KALM_M | 79          | 97 | 133        | 137 | 0          | 0   | 219       | 221 | 248        | 260 | 143         | 161 | 206        | 206 | 115         | 115 | 258        | 262 | 148        | 148 | 180        | 182 |
| KALM 13 | KALM_M | 81          | 81 | 137        | 141 | 164        | 164 | 217       | 221 | 248        | 248 | 151         | 151 | 204        | 214 | 117         | 121 | 266        | 268 | 148        | 148 | 178        | 180 |
| KALM 14 | KALM_M | 97          | 97 | 127        | 135 | 156        | 156 | 213       | 219 | 248        | 260 | 143         | 169 | 200        | 206 | 117         | 121 | 262        | 264 | 148        | 148 | 182        | 182 |
| KALM 15 | KALM_M | 83          | 87 | 135        | 139 | 160        | 162 | 217       | 225 | 248        | 252 | 151         | 151 | 206        | 212 | 111         | 115 | 262        | 266 | 148        | 148 | 180        | 188 |

|         |        |    |    |     |     |     |     |     |     |     |     |     |     |     |     |     |     |     |     |     |     |     |     |
|---------|--------|----|----|-----|-----|-----|-----|-----|-----|-----|-----|-----|-----|-----|-----|-----|-----|-----|-----|-----|-----|-----|-----|
| KALM 16 | KALM_M | 81 | 93 | 127 | 135 | 152 | 156 | 219 | 223 | 248 | 260 | 137 | 143 | 208 | 212 | 115 | 121 | 264 | 266 | 148 | 148 | 180 | 182 |
| KALM 17 | KALM_M | 87 | 91 | 133 | 135 | 0   | 0   | 217 | 219 | 248 | 248 | 151 | 173 | 206 | 214 | 113 | 119 | 266 | 266 | 148 | 148 | 188 | 190 |
| KALM 18 | KALM_M | 81 | 91 | 127 | 133 | 166 | 166 | 219 | 219 | 248 | 260 | 141 | 151 | 206 | 210 | 115 | 115 | 258 | 262 | 140 | 150 | 180 | 182 |
| KALM 19 | KALM_M | 81 | 87 | 135 | 135 | 152 | 162 | 213 | 219 | 260 | 260 | 137 | 149 | 198 | 212 | 115 | 121 | 258 | 264 | 148 | 150 | 180 | 182 |
| KALM 20 | KALM_M | 81 | 93 | 127 | 133 | 166 | 166 | 219 | 221 | 248 | 248 | 161 | 161 | 206 | 214 | 113 | 121 | 262 | 266 | 150 | 150 | 182 | 186 |
| KALM 21 | KALM_M | 79 | 81 | 133 | 137 | 0   | 0   | 219 | 221 | 248 | 252 | 143 | 155 | 198 | 214 | 113 | 123 | 262 | 262 | 148 | 148 | 182 | 188 |
| KALM 22 | KALM_M | 77 | 83 | 139 | 141 | 162 | 166 | 217 | 221 | 248 | 260 | 149 | 153 | 214 | 214 | 117 | 121 | 258 | 262 | 148 | 150 | 178 | 182 |
| KALM 23 | KALM_M | 77 | 97 | 137 | 137 | 0   | 0   | 219 | 223 | 248 | 248 | 143 | 153 | 198 | 206 | 115 | 121 | 258 | 262 | 144 | 150 | 182 | 188 |
| KALM 24 | KALM_M | 89 | 93 | 135 | 137 | 162 | 170 | 217 | 219 | 248 | 248 | 143 | 161 | 210 | 214 | 123 | 123 | 266 | 270 | 140 | 148 | 180 | 188 |
| KALM 25 | KALM_M | 83 | 97 | 133 | 139 | 164 | 168 | 219 | 219 | 248 | 248 | 143 | 161 | 214 | 214 | 115 | 121 | 262 | 266 | 148 | 150 | 182 | 182 |
| KALM 26 | KALM_M | 77 | 79 | 133 | 137 | 164 | 172 | 215 | 219 | 248 | 248 | 151 | 161 | 208 | 214 | 115 | 121 | 262 | 266 | 148 | 150 | 182 | 182 |
| KALM 27 | KALM_M | 79 | 89 | 133 | 143 | 164 | 174 | 221 | 225 | 248 | 260 | 151 | 161 | 202 | 208 | 115 | 115 | 262 | 266 | 148 | 148 | 180 | 182 |
| KALM 28 | KALM_M | 89 | 97 | 137 | 139 | 0   | 0   | 213 | 219 | 248 | 248 | 137 | 161 | 202 | 208 | 0   | 0   | 262 | 264 | 140 | 144 | 182 | 186 |
| KRGZ 1  | KRGZ_M | 81 | 93 | 133 | 135 | 160 | 168 | 217 | 219 | 248 | 260 | 161 | 169 | 198 | 206 | 119 | 121 | 266 | 266 | 148 | 150 | 182 | 188 |
| KRGZ 2  | KRGZ_M | 91 | 93 | 133 | 137 | 170 | 172 | 219 | 221 | 248 | 252 | 151 | 161 | 206 | 206 | 115 | 123 | 260 | 266 | 148 | 150 | 180 | 188 |
| KRGZ 3  | KRGZ_M | 81 | 93 | 133 | 139 | 154 | 154 | 219 | 223 | 248 | 252 | 161 | 161 | 206 | 206 | 115 | 123 | 262 | 266 | 140 | 150 | 188 | 188 |
| KRGZ 4  | KRGZ_M | 79 | 97 | 133 | 135 | 168 | 168 | 217 | 217 | 248 | 248 | 145 | 151 | 206 | 214 | 115 | 117 | 266 | 266 | 148 | 150 | 180 | 188 |
| KRGZ 5  | KRGZ_M | 81 | 83 | 131 | 133 | 168 | 170 | 217 | 219 | 248 | 248 | 143 | 143 | 206 | 212 | 115 | 117 | 260 | 262 | 146 | 150 | 180 | 190 |
| KRGZ 6  | KRGZ_M | 87 | 89 | 135 | 139 | 160 | 168 | 217 | 221 | 248 | 258 | 137 | 143 | 206 | 206 | 115 | 115 | 258 | 266 | 148 | 150 | 178 | 180 |
| KRGZ 7  | KRGZ_M | 81 | 97 | 127 | 133 | 164 | 168 | 217 | 219 | 248 | 248 | 153 | 163 | 206 | 214 | 115 | 121 | 266 | 272 | 144 | 150 | 182 | 182 |
| KRGZ 8  | KRGZ_M | 81 | 91 | 133 | 137 | 168 | 172 | 217 | 223 | 260 | 262 | 141 | 145 | 206 | 208 | 115 | 119 | 260 | 262 | 148 | 148 | 180 | 182 |
| KRGZ 9  | KRGZ_M | 81 | 99 | 125 | 135 | 162 | 168 | 219 | 221 | 248 | 256 | 141 | 143 | 198 | 214 | 117 | 123 | 266 | 266 | 144 | 150 | 180 | 182 |
| KRGZ 10 | KRGZ_M | 89 | 93 | 127 | 133 | 168 | 170 | 219 | 221 | 248 | 256 | 161 | 161 | 206 | 206 | 119 | 123 | 260 | 266 | 148 | 150 | 180 | 182 |
| KRGZ 11 | KRGZ_M | 81 | 81 | 135 | 141 | 164 | 170 | 209 | 217 | 248 | 258 | 143 | 179 | 206 | 210 | 115 | 117 | 262 | 262 | 144 | 150 | 178 | 188 |
| KRGZ 12 | KRGZ_M | 79 | 89 | 139 | 139 | 164 | 172 | 217 | 221 | 248 | 260 | 149 | 161 | 206 | 208 | 115 | 117 | 264 | 266 | 148 | 150 | 178 | 188 |
| KRGZ 13 | KRGZ_M | 83 | 89 | 133 | 135 | 170 | 170 | 219 | 219 | 248 | 254 | 145 | 151 | 200 | 212 | 115 | 115 | 262 | 264 | 140 | 150 | 180 | 188 |
| KRGZ 14 | KRGZ_M | 77 | 97 | 135 | 141 | 170 | 178 | 217 | 219 | 248 | 252 | 141 | 153 | 198 | 208 | 115 | 117 | 266 | 266 | 144 | 148 | 178 | 180 |
| KRGZ 15 | KRGZ_M | 77 | 89 | 127 | 135 | 170 | 176 | 217 | 217 | 248 | 260 | 143 | 179 | 208 | 216 | 117 | 121 | 262 | 266 | 150 | 158 | 178 | 180 |
| KRGZ 16 | KRGZ_M | 81 | 89 | 125 | 127 | 154 | 184 | 217 | 219 | 248 | 252 | 149 | 151 | 200 | 206 | 115 | 123 | 262 | 266 | 140 | 144 | 180 | 182 |
| KRGZ 17 | KRGZ_M | 89 | 99 | 139 | 139 | 154 | 170 | 219 | 219 | 248 | 252 | 141 | 151 | 206 | 206 | 119 | 125 | 262 | 266 | 144 | 150 | 182 | 184 |
| KRGZ 18 | KRGZ_M | 81 | 97 | 125 | 127 | 164 | 170 | 217 | 219 | 252 | 256 | 143 | 153 | 206 | 216 | 117 | 123 | 258 | 266 | 142 | 148 | 178 | 190 |
| KRGZ 19 | KRGZ_M | 95 | 97 | 137 | 139 | 154 | 176 | 219 | 221 | 248 | 252 | 143 | 151 | 208 | 212 | 115 | 121 | 266 | 268 | 150 | 150 | 180 | 182 |
| KRGZ 20 | KRGZ_M | 81 | 83 | 133 | 139 | 160 | 162 | 219 | 223 | 248 | 250 | 147 | 179 | 206 | 208 | 115 | 115 | 266 | 266 | 144 | 150 | 188 | 188 |
| KZWH 1  | KZWH_M | 89 | 91 | 127 | 133 | 170 | 172 | 219 | 219 | 248 | 260 | 143 | 169 | 214 | 214 | 115 | 121 | 262 | 262 | 140 | 150 | 182 | 188 |
| KZWH 2  | KZWH_M | 87 | 87 | 133 | 133 | 166 | 172 | 219 | 221 | 248 | 252 | 143 | 161 | 214 | 214 | 115 | 123 | 262 | 266 | 140 | 140 | 188 | 188 |
| KZWH 3  | KZWH_M | 93 | 93 | 135 | 141 | 172 | 176 | 219 | 219 | 248 | 252 | 143 | 143 | 206 | 206 | 115 | 115 | 260 | 266 | 150 | 150 | 178 | 182 |
| KZWH 4  | KZWH_M | 89 | 91 | 127 | 133 | 170 | 176 | 215 | 221 | 248 | 260 | 143 | 161 | 212 | 214 | 113 | 115 | 262 | 266 | 144 | 148 | 178 | 180 |
| KZWH 5  | KZWH_M | 89 | 93 | 135 | 135 | 162 | 162 | 217 | 221 | 248 | 260 | 143 | 151 | 214 | 214 | 115 | 117 | 262 | 266 | 146 | 150 | 178 | 182 |
| KZWH 6  | KZWH_M | 91 | 93 | 139 | 141 | 162 | 176 | 219 | 221 | 260 | 260 | 143 | 161 | 214 | 214 | 115 | 115 | 262 | 266 | 146 | 150 | 178 | 182 |
| KZWH 7  | KZWH_M | 79 | 87 | 141 | 141 | 172 | 180 | 219 | 219 | 248 | 254 | 141 | 151 | 202 | 214 | 115 | 117 | 262 | 266 | 144 | 144 | 178 | 182 |
| KZWH 8  | KZWH_M | 91 | 91 | 127 | 139 | 154 | 162 | 215 | 221 | 248 | 254 | 139 | 161 | 212 | 214 | 113 | 123 | 262 | 262 | 146 | 148 | 180 | 180 |
| KZWH 9  | KZWH_M | 89 | 91 | 133 | 141 | 170 | 172 | 215 | 217 | 260 | 260 | 143 | 143 | 214 | 214 | 115 | 119 | 264 | 268 | 146 | 146 | 178 | 182 |
| KZWH 10 | KZWH_M | 89 | 91 | 133 | 141 | 170 | 172 | 215 | 219 | 248 | 248 | 143 | 183 | 214 | 214 | 115 | 117 | 260 | 266 | 146 | 146 | 182 | 182 |
| KZWH 11 | KZWH_M | 89 | 91 | 133 | 141 | 170 | 172 | 215 | 219 | 248 | 248 | 143 | 183 | 214 | 214 | 115 | 117 | 260 | 266 | 146 | 146 | 182 | 182 |
| KZWH 12 | KZWH_M | 89 | 97 | 127 | 135 | 162 | 168 | 219 | 221 | 252 | 254 | 161 | 161 | 206 | 206 | 115 | 115 | 262 | 272 | 140 | 146 | 178 | 182 |
| KZWH 13 | KZWH_M | 77 | 93 | 125 | 125 | 154 | 172 | 217 | 221 | 248 | 256 | 143 | 149 | 208 | 214 | 117 | 123 | 266 | 266 | 146 | 148 | 182 | 188 |
| KZWH 14 | KZWH_M | 89 | 91 | 125 | 133 | 160 | 172 | 215 | 219 | 252 | 254 | 161 | 183 | 210 | 214 | 117 | 117 | 260 | 266 | 140 | 146 | 182 | 182 |

|         |        |    |    |     |     |     |     |     |     |     |     |     |     |     |     |     |     |     |     |     |     |     |     |
|---------|--------|----|----|-----|-----|-----|-----|-----|-----|-----|-----|-----|-----|-----|-----|-----|-----|-----|-----|-----|-----|-----|-----|
| KZWH 15 | KZWH_M | 83 | 89 | 135 | 141 | 168 | 172 | 217 | 217 | 248 | 252 | 143 | 161 | 206 | 214 | 115 | 117 | 262 | 262 | 140 | 150 | 182 | 188 |
| KZWH 16 | KZWH_M | 81 | 91 | 135 | 137 | 162 | 168 | 217 | 221 | 248 | 256 | 161 | 183 | 214 | 214 | 115 | 115 | 262 | 262 | 140 | 146 | 180 | 180 |
| KZWH 17 | KZWH_M | 83 | 89 | 125 | 135 | 162 | 172 | 217 | 219 | 248 | 260 | 147 | 161 | 214 | 214 | 115 | 115 | 262 | 268 | 140 | 140 | 182 | 182 |
| KZWH 18 | KZWH_M | 81 | 93 | 137 | 137 | 162 | 172 | 219 | 221 | 252 | 260 | 143 | 151 | 206 | 214 | 117 | 121 | 262 | 262 | 140 | 140 | 178 | 182 |
| KZWH 19 | KZWH_M | 83 | 89 | 125 | 127 | 154 | 170 | 219 | 219 | 248 | 260 | 143 | 183 | 214 | 214 | 117 | 123 | 262 | 266 | 146 | 148 | 182 | 182 |
| KZWH 20 | KZWH_M | 89 | 93 | 135 | 137 | 154 | 170 | 215 | 221 | 248 | 262 | 143 | 155 | 214 | 214 | 113 | 119 | 262 | 262 | 144 | 146 | 182 | 182 |
| KZWH 21 | KZWH_M | 81 | 89 | 133 | 139 | 168 | 170 | 215 | 219 | 248 | 262 | 143 | 161 | 202 | 214 | 115 | 117 | 262 | 266 | 148 | 150 | 178 | 188 |
| KZWH 22 | KZWH_M | 89 | 93 | 125 | 135 | 168 | 172 | 215 | 219 | 248 | 256 | 161 | 183 | 214 | 214 | 115 | 117 | 260 | 262 | 146 | 148 | 178 | 178 |
| KZWH 23 | KZWH_M | 83 | 89 | 133 | 135 | 170 | 180 | 215 | 221 | 254 | 260 | 143 | 143 | 206 | 214 | 117 | 119 | 260 | 266 | 140 | 146 | 182 | 182 |
| KZWH 24 | KZWH_M | 89 | 93 | 125 | 139 | 154 | 172 | 219 | 219 | 248 | 262 | 143 | 147 | 208 | 214 | 115 | 115 | 262 | 264 | 140 | 146 | 178 | 182 |
| KZWH 25 | KZWH_M | 89 | 93 | 137 | 141 | 170 | 170 | 221 | 221 | 248 | 248 | 161 | 161 | 202 | 214 | 113 | 117 | 262 | 262 | 142 | 146 | 180 | 182 |
| KZWH 26 | KZWH_M | 89 | 89 | 133 | 135 | 154 | 162 | 215 | 217 | 252 | 260 | 161 | 161 | 206 | 214 | 115 | 117 | 266 | 268 | 144 | 150 | 178 | 180 |
| KZWH 27 | KZWH_M | 89 | 93 | 133 | 137 | 154 | 172 | 219 | 219 | 248 | 252 | 143 | 161 | 206 | 214 | 115 | 115 | 262 | 266 | 140 | 150 | 178 | 188 |
| KZWH 28 | KZWH_M | 83 | 87 | 133 | 133 | 168 | 170 | 219 | 221 | 248 | 260 | 143 | 161 | 208 | 214 | 115 | 117 | 262 | 268 | 140 | 146 | 178 | 188 |
| KZWH 29 | KZWH_M | 81 | 83 | 133 | 139 | 162 | 172 | 221 | 221 | 248 | 260 | 143 | 143 | 214 | 214 | 115 | 117 | 260 | 262 | 146 | 146 | 180 | 182 |
| KZWH 30 | KZWH_M | 81 | 93 | 133 | 135 | 162 | 170 | 217 | 221 | 248 | 260 | 161 | 169 | 214 | 214 | 117 | 117 | 262 | 266 | 140 | 148 | 178 | 178 |
| HRFD 1  | HRFD_M | 89 | 97 | 135 | 139 | 160 | 162 | 219 | 219 | 248 | 252 | 161 | 163 | 206 | 214 | 115 | 123 | 266 | 266 | 140 | 146 | 182 | 188 |
| HRFD 2  | HRFD_M | 89 | 89 | 133 | 133 | 160 | 160 | 219 | 221 | 252 | 252 | 161 | 161 | 206 | 214 | 117 | 121 | 260 | 262 | 144 | 148 | 182 | 182 |
| HRFD 3  | HRFD_M | 91 | 91 | 139 | 141 | 162 | 172 | 217 | 221 | 248 | 260 | 147 | 161 | 214 | 214 | 115 | 117 | 266 | 266 | 140 | 148 | 182 | 182 |
| HRFD 4  | HRFD_M | 87 | 91 | 139 | 141 | 162 | 172 | 217 | 221 | 248 | 260 | 143 | 147 | 214 | 214 | 115 | 117 | 266 | 266 | 140 | 146 | 178 | 182 |
| HRFD 5  | HRFD_M | 87 | 91 | 133 | 139 | 162 | 172 | 217 | 221 | 252 | 260 | 143 | 149 | 214 | 214 | 117 | 117 | 262 | 266 | 146 | 148 | 182 | 182 |
| HRFD 6  | HRFD_M | 93 | 97 | 133 | 135 | 160 | 160 | 219 | 221 | 248 | 260 | 143 | 161 | 214 | 214 | 115 | 123 | 266 | 266 | 148 | 148 | 178 | 182 |
| HRFD 7  | HRFD_M | 89 | 89 | 127 | 133 | 160 | 172 | 221 | 221 | 248 | 252 | 141 | 161 | 214 | 214 | 117 | 117 | 262 | 262 | 144 | 150 | 182 | 182 |
| HRFD 8  | HRFD_M | 97 | 97 | 131 | 135 | 162 | 172 | 219 | 221 | 248 | 252 | 141 | 161 | 214 | 214 | 115 | 123 | 262 | 264 | 148 | 148 | 182 | 182 |
| HRFD 9  | HRFD_M | 85 | 87 | 135 | 139 | 154 | 162 | 215 | 221 | 248 | 252 | 161 | 161 | 214 | 214 | 117 | 117 | 262 | 266 | 144 | 154 | 178 | 182 |
| HRFD 10 | HRFD_M | 87 | 87 | 135 | 139 | 154 | 162 | 215 | 221 | 248 | 248 | 143 | 161 | 214 | 214 | 117 | 117 | 260 | 266 | 148 | 150 | 182 | 188 |
| HRFD 11 | HRFD_M | 91 | 97 | 135 | 139 | 160 | 160 | 221 | 221 | 248 | 248 | 161 | 161 | 214 | 214 | 117 | 123 | 260 | 264 | 140 | 148 | 178 | 178 |
| HRFD 12 | HRFD_M | 89 | 97 | 131 | 139 | 160 | 162 | 219 | 221 | 248 | 260 | 143 | 161 | 214 | 214 | 117 | 117 | 264 | 266 | 148 | 148 | 182 | 182 |
| HRFD 13 | HRFD_M | 79 | 93 | 139 | 139 | 160 | 162 | 219 | 221 | 248 | 260 | 143 | 161 | 206 | 214 | 115 | 117 | 266 | 266 | 140 | 148 | 178 | 182 |
| HRFD 14 | HRFD_M | 89 | 93 | 131 | 133 | 154 | 170 | 217 | 221 | 248 | 248 | 143 | 161 | 208 | 214 | 115 | 117 | 262 | 266 | 144 | 146 | 182 | 182 |
| HRFD 15 | HRFD_M | 79 | 91 | 133 | 139 | 154 | 162 | 219 | 219 | 248 | 252 | 143 | 161 | 214 | 214 | 117 | 117 | 264 | 266 | 140 | 148 | 182 | 182 |
| HRFD 16 | HRFD_M | 89 | 97 | 135 | 141 | 160 | 160 | 217 | 219 | 252 | 260 | 141 | 161 | 214 | 214 | 115 | 117 | 260 | 264 | 148 | 148 | 178 | 178 |
| HRFD 17 | HRFD_M | 89 | 89 | 131 | 139 | 160 | 170 | 215 | 221 | 248 | 260 | 141 | 161 | 214 | 214 | 117 | 117 | 262 | 266 | 144 | 144 | 182 | 182 |
| HRFD 18 | HRFD_M | 89 | 93 | 133 | 135 | 160 | 172 | 221 | 221 | 248 | 256 | 143 | 151 | 214 | 214 | 117 | 117 | 262 | 262 | 144 | 146 | 182 | 182 |
| HRFD 19 | HRFD_M | 89 | 91 | 139 | 139 | 154 | 162 | 221 | 221 | 248 | 256 | 147 | 183 | 208 | 208 | 115 | 117 | 266 | 266 | 146 | 150 | 182 | 182 |
| HRFD 20 | HRFD_M | 87 | 93 | 139 | 139 | 154 | 172 | 221 | 221 | 252 | 260 | 151 | 161 | 208 | 214 | 117 | 117 | 260 | 266 | 144 | 150 | 178 | 182 |
| HRFD 21 | HRFD_M | 87 | 91 | 135 | 139 | 154 | 162 | 221 | 221 | 248 | 256 | 141 | 161 | 208 | 214 | 115 | 123 | 262 | 266 | 140 | 146 | 182 | 182 |
| HRFD 22 | HRFD_M | 89 | 89 | 135 | 137 | 160 | 172 | 219 | 221 | 256 | 260 | 161 | 161 | 214 | 214 | 115 | 115 | 260 | 266 | 146 | 150 | 182 | 182 |
| HRFD 23 | HRFD_M | 97 | 97 | 137 | 139 | 160 | 162 | 219 | 221 | 256 | 256 | 141 | 161 | 214 | 214 | 115 | 123 | 260 | 268 | 144 | 148 | 178 | 182 |
| HRFD 24 | HRFD_M | 89 | 97 | 135 | 137 | 160 | 160 | 219 | 221 | 254 | 256 | 141 | 161 | 214 | 214 | 115 | 123 | 260 | 262 | 144 | 146 | 182 | 182 |
| HRFD 25 | HRFD_M | 89 | 91 | 133 | 135 | 160 | 162 | 219 | 221 | 254 | 256 | 141 | 143 | 214 | 214 | 115 | 123 | 262 | 266 | 140 | 148 | 182 | 182 |
| HRFD 26 | HRFD_M | 89 | 91 | 133 | 135 | 160 | 162 | 219 | 221 | 254 | 256 | 141 | 143 | 214 | 214 | 115 | 123 | 262 | 266 | 140 | 148 | 182 | 182 |
| MONG 1  | MONG_M | 93 | 93 | 137 | 137 | 160 | 184 | 217 | 219 | 248 | 260 | 151 | 151 | 202 | 214 | 115 | 115 | 262 | 266 | 146 | 160 | 178 | 182 |
| MONG 2  | MONG_M | 79 | 93 | 137 | 137 | 164 | 164 | 217 | 219 | 248 | 248 | 141 | 161 | 202 | 216 | 115 | 117 | 262 | 266 | 140 | 150 | 180 | 180 |
| MONG 3  | MONG_M | 87 | 87 | 137 | 139 | 154 | 154 | 217 | 217 | 248 | 260 | 149 | 153 | 208 | 214 | 115 | 117 | 266 | 266 | 146 | 150 | 182 | 182 |
| MONG 4  | MONG_M | 69 | 97 | 137 | 139 | 160 | 160 | 215 | 219 | 244 | 256 | 143 | 151 | 206 | 210 | 115 | 115 | 260 | 260 | 144 | 148 | 180 | 182 |
| MONG 5  | MONG_M | 77 | 87 | 129 | 139 | 164 | 164 | 217 | 219 | 248 | 256 | 151 | 153 | 214 | 216 | 115 | 115 | 266 | 272 | 144 | 160 | 180 | 188 |

|         |        |    |    |     |     |     |     |     |     |     |     |     |     |     |     |     |     |     |     |     |     |     |     |
|---------|--------|----|----|-----|-----|-----|-----|-----|-----|-----|-----|-----|-----|-----|-----|-----|-----|-----|-----|-----|-----|-----|-----|
| MONG 6  | MONG_M | 77 | 83 | 135 | 137 | 176 | 176 | 225 | 225 | 248 | 256 | 143 | 145 | 206 | 208 | 115 | 115 | 262 | 264 | 144 | 150 | 178 | 182 |
| MONG 7  | MONG_M | 83 | 91 | 133 | 137 | 162 | 180 | 225 | 225 | 248 | 256 | 143 | 151 | 198 | 208 | 115 | 115 | 262 | 262 | 148 | 150 | 178 | 188 |
| MONG 8  | MONG_M | 81 | 89 | 137 | 139 | 170 | 172 | 219 | 219 | 248 | 252 | 161 | 161 | 208 | 214 | 115 | 115 | 266 | 266 | 144 | 160 | 178 | 182 |
| MONG 9  | MONG_M | 83 | 83 | 127 | 139 | 172 | 172 | 217 | 219 | 248 | 248 | 143 | 147 | 214 | 216 | 117 | 123 | 262 | 266 | 144 | 144 | 180 | 182 |
| MONG 10 | MONG_M | 81 | 81 | 127 | 135 | 168 | 176 | 219 | 219 | 248 | 256 | 151 | 151 | 206 | 206 | 115 | 117 | 262 | 266 | 144 | 150 | 180 | 188 |
| MONG 11 | MONG_M | 81 | 87 | 135 | 137 | 160 | 176 | 219 | 219 | 254 | 260 | 151 | 151 | 208 | 212 | 117 | 123 | 266 | 274 | 148 | 150 | 180 | 188 |
| MONG 12 | MONG_M | 83 | 87 | 135 | 139 | 160 | 170 | 221 | 221 | 252 | 260 | 151 | 151 | 198 | 214 | 115 | 121 | 266 | 266 | 144 | 148 | 182 | 182 |
| MONG 13 | MONG_M | 81 | 91 | 139 | 143 | 168 | 168 | 221 | 221 | 248 | 260 | 143 | 149 | 210 | 214 | 123 | 123 | 262 | 266 | 146 | 150 | 178 | 188 |
| MONG 14 | MONG_M | 83 | 83 | 137 | 139 | 164 | 176 | 219 | 219 | 248 | 256 | 151 | 153 | 208 | 214 | 115 | 115 | 260 | 260 | 148 | 150 | 182 | 182 |
| MONG 15 | MONG_M | 81 | 91 | 137 | 137 | 160 | 160 | 217 | 219 | 248 | 252 | 143 | 161 | 206 | 208 | 117 | 117 | 264 | 266 | 150 | 160 | 182 | 188 |
| MONG 16 | MONG_M | 81 | 91 | 139 | 141 | 160 | 160 | 219 | 221 | 248 | 248 | 149 | 171 | 214 | 214 | 121 | 123 | 262 | 262 | 146 | 160 | 178 | 182 |
| MONG 17 | MONG_M | 81 | 91 | 127 | 139 | 168 | 176 | 219 | 221 | 248 | 248 | 143 | 151 | 204 | 206 | 115 | 123 | 258 | 262 | 144 | 148 | 182 | 182 |
| MONG 18 | MONG_M | 77 | 87 | 127 | 127 | 160 | 166 | 217 | 217 | 248 | 248 | 151 | 153 | 196 | 210 | 115 | 115 | 262 | 262 | 144 | 150 | 180 | 182 |
| MONG 19 | MONG_M | 89 | 97 | 137 | 137 | 160 | 160 | 219 | 219 | 248 | 260 | 153 | 165 | 214 | 214 | 115 | 117 | 262 | 266 | 144 | 160 | 180 | 182 |
| MONG 20 | MONG_M | 81 | 93 | 129 | 133 | 180 | 180 | 217 | 217 | 248 | 260 | 141 | 143 | 206 | 210 | 115 | 119 | 264 | 266 | 144 | 144 | 180 | 182 |
| MONG 21 | MONG_M | 81 | 83 | 135 | 139 | 178 | 178 | 217 | 221 | 248 | 252 | 143 | 151 | 214 | 214 | 115 | 123 | 262 | 266 | 144 | 160 | 180 | 182 |
| MONG 22 | MONG_M | 79 | 91 | 139 | 139 | 176 | 176 | 219 | 221 | 248 | 256 | 143 | 143 | 206 | 214 | 123 | 123 | 262 | 266 | 144 | 148 | 178 | 182 |
| MONG 23 | MONG_M | 81 | 83 | 135 | 135 | 164 | 178 | 213 | 219 | 252 | 252 | 151 | 161 | 198 | 208 | 117 | 117 | 262 | 264 | 144 | 148 | 182 | 182 |
| MONG 24 | MONG_M | 81 | 91 | 139 | 139 | 160 | 160 | 219 | 219 | 248 | 252 | 161 | 161 | 198 | 214 | 117 | 123 | 262 | 266 | 148 | 150 | 180 | 188 |
| MONG 25 | MONG_M | 77 | 81 | 125 | 135 | 164 | 178 | 221 | 225 | 248 | 254 | 143 | 151 | 208 | 208 | 117 | 117 | 266 | 266 | 144 | 144 | 180 | 182 |
| MONG 26 | MONG_M | 89 | 93 | 135 | 137 | 180 | 186 | 219 | 219 | 252 | 256 | 153 | 161 | 214 | 214 | 115 | 117 | 266 | 266 | 144 | 144 | 182 | 182 |
| MONG 27 | MONG_M | 81 | 89 | 137 | 141 | 160 | 172 | 217 | 221 | 248 | 260 | 151 | 151 | 212 | 214 | 115 | 121 | 262 | 262 | 144 | 150 | 180 | 182 |
| MONG 28 | MONG_M | 81 | 97 | 137 | 139 | 160 | 184 | 215 | 217 | 248 | 260 | 151 | 151 | 198 | 214 | 123 | 123 | 266 | 266 | 140 | 146 | 188 | 188 |
| MONG 29 | MONG_M | 79 | 89 | 135 | 135 | 176 | 182 | 215 | 219 | 248 | 256 | 151 | 151 | 214 | 214 | 117 | 117 | 262 | 262 | 146 | 148 | 180 | 188 |
| MONG 30 | MONG_M | 79 | 89 | 135 | 135 | 176 | 182 | 215 | 219 | 248 | 256 | 151 | 151 | 214 | 214 | 117 | 117 | 262 | 262 | 146 | 148 | 180 | 188 |
| MONG 31 | MONG_M | 83 | 91 | 133 | 137 | 180 | 182 | 221 | 221 | 248 | 256 | 141 | 157 | 214 | 214 | 115 | 115 | 0   | 0   | 148 | 150 | 182 | 188 |
| MONG 32 | MONG_M | 89 | 91 | 135 | 135 | 160 | 160 | 215 | 221 | 254 | 256 | 151 | 161 | 208 | 214 | 115 | 119 | 266 | 266 | 144 | 150 | 182 | 188 |
| MONG 33 | MONG_M | 89 | 89 | 127 | 139 | 182 | 188 | 219 | 219 | 256 | 256 | 139 | 143 | 206 | 208 | 115 | 117 | 262 | 266 | 140 | 146 | 188 | 188 |
| MONG 34 | MONG_M | 89 | 91 | 135 | 135 | 160 | 182 | 215 | 221 | 254 | 256 | 151 | 161 | 208 | 214 | 115 | 117 | 266 | 266 | 144 | 150 | 182 | 188 |
| MONG 35 | MONG_M | 77 | 81 | 125 | 135 | 154 | 168 | 217 | 225 | 248 | 248 | 143 | 151 | 214 | 214 | 115 | 117 | 264 | 268 | 144 | 144 | 180 | 182 |
| MONG 36 | MONG_M | 77 | 83 | 131 | 135 | 168 | 182 | 217 | 219 | 248 | 256 | 143 | 143 | 198 | 206 | 115 | 117 | 264 | 264 | 146 | 150 | 182 | 188 |
| MONG 37 | MONG_M | 81 | 83 | 127 | 137 | 170 | 172 | 221 | 221 | 248 | 248 | 143 | 181 | 198 | 214 | 115 | 115 | 262 | 266 | 144 | 150 | 182 | 182 |
| MONG 38 | MONG_M | 81 | 97 | 135 | 135 | 160 | 168 | 217 | 219 | 248 | 260 | 143 | 151 | 206 | 214 | 0   | 0   | 268 | 274 | 144 | 148 | 182 | 182 |
| MONG 39 | MONG_M | 77 | 81 | 135 | 137 | 160 | 160 | 219 | 219 | 260 | 260 | 151 | 171 | 208 | 214 | 115 | 115 | 264 | 266 | 144 | 150 | 180 | 182 |
| MONG 40 | MONG_M | 83 | 83 | 135 | 137 | 160 | 160 | 221 | 221 | 248 | 256 | 141 | 169 | 198 | 214 | 117 | 117 | 264 | 264 | 148 | 150 | 182 | 182 |
| MONG 41 | MONG_M | 77 | 77 | 135 | 137 | 160 | 160 | 219 | 225 | 260 | 260 | 143 | 169 | 208 | 214 | 117 | 123 | 264 | 266 | 150 | 150 | 180 | 182 |
