# Supplementary material for: Comparative Study of the Genetic Diversity of Local Steppe Cattle Breeds from Russia, Kazakhstan and Kyrgyzstan by Microsatellite Analysis of Museum and Modern Samples
Source: MDPI journal article supplement (doi:10.3390/d13080351), 2021-07-30
Supplement: s1 [file s1]

Table S1. Quantitative and qualitative characteristics of DNA extracted from the museum specimens and number of replicates used for estimating the consensus genotypes

| Sample ID | Breed | dsDNA, ng/μl | OD260/OD280 | Number of replicates |
|-----------|-------|--------------|-------------|----------------------|
| H172      | KALM  | 14.60        | 1.92        | 5                    |
| H210      | KALM  | 3.68         | 1.67        | 8                    |
| H215      | KALM  | 3.12         | 1.55        | 5                    |
| H219      | KALM  | 5.50         | 1.65        | 5                    |
| H220      | KALM  | 5.82         | 1.51        | 5                    |
| H221      | KALM  | 38.40        | 1.79        | 5                    |
| H222      | KALM  | 4.64         | 1.69        | 5                    |
| H223      | KALM  | 5.64         | 1.82        | 5                    |
| H227      | KALM  | 4.04         | 1.82        | 5                    |
| H231      | KALM  | 6.24         | 1.82        | 5                    |
| H173      | KRGZ  | 4.10         | 1.51        | 5                    |
| H175      | KRGZ  | 6.54         | 1.49        | 7                    |
| H176      | KRGZ  | 8.44         | 1.58        | 5                    |
| H178      | KRGZ  | 2.88         | 1.50        | 8                    |
| H179      | KRGZ  | 5.22         | 1.77        | 5                    |
| H180      | KRGZ  | 4.70         | 1.79        | 5                    |
| H181      | KRGZ  | 11.80        | 1.74        | 5                    |
| H182      | KRGZ  | 8.38         | 1.76        | 5                    |
| H183      | KRGZ  | 2.88         | 1.48        | 5                    |
| H184      | KRGZ  | 28.00        | 1.83        | 5                    |
| H186      | KRGZ  | 6.50         | 1.78        | 5                    |
| H354      | KZKH  | 21.20        | 1.90        | 5                    |
| H355      | KZKH  | 6.84         | 1.78        | 8                    |
| H104      | KZKH  | 5.42         | 1.47        | 5                    |

Sample ID - individual number of sample, Breeds: KALM – Kalmyk, KRGZ – Kyrgyz, KZKH – Kazakh, dsDNA - concentration of double-stranded DNA (ng/μl), OD260/OD280 - OD ratio.
