# Supplementary material for: Comparative Study of the Genetic Diversity of Local Steppe Cattle Breeds from Russia, Kazakhstan and Kyrgyzstan by Microsatellite Analysis of Museum and Modern Samples
Source: MDPI journal article supplement (doi:10.3390/d13080351), 2021-07-30
Supplement: s1 [file s1]

Table S3. Quality of microsatellite genotyping of museum samples at different loci

| #  | Locus   | Mean<br>QI value<br>(M ± SE) | QI = 1                     |                        | 0.75 ≤ QI < 1.00        |                        | Probability (p)<br>of correct<br>genotyping |
|----|---------|------------------------------|----------------------------|------------------------|-------------------------|------------------------|---------------------------------------------|
|    |         |                              | Number<br>of<br>samples, n | Ratio of<br>samples, % | Number of<br>samples, n | Ratio of<br>samples, % |                                             |
| 1  | TGLA227 | 0.988 ± 0.008                | 22                         | 91.7                   | 2                       | 8.3                    | ***                                         |
| 2  | BM2113  | 1.000 ± 0.000                | 24                         | 100.0                  | 0                       | 0.0                    | ***                                         |
| 3  | TGLA53  | 0.961 ± 0.018                | 18                         | 81.8                   | 4                       | 18.2                   | ***                                         |
| 4  | ETH10   | 0.992 ± 0.008                | 23                         | 95.8                   | 1                       | 4.2                    | ***                                         |
| 5  | SPS115  | 0.967 ± 0.016                | 20                         | 83.3                   | 4                       | 16.7                   | ***                                         |
| 6  | TGLA122 | 0.960 ± 0.019                | 20                         | 83.3                   | 4                       | 16.7                   | ***                                         |
| 7  | INRA23  | 0.994 ± 0.006                | 22                         | 95.7                   | 1                       | 4.3                    | ***                                         |
| 8  | TGLA126 | 0.983 ± 0.012                | 21                         | 91.3                   | 2                       | 8.7                    | ***                                         |
| 9  | BM1818  | 0.965 ± 0.019                | 17                         | 85.0                   | 3                       | 15.0                   | ***                                         |
| 10 | ETH225  | 0.988 ± 0.008                | 22                         | 91.7                   | 2                       | 8.3                    | ***                                         |
| 11 | BM1824  | 1.000 ± 0.000                | 24                         | 100.0                  | 0                       | 0.0                    | ***                                         |

QI – quality indices (the calculation of quality indices is described in section 2.2 of the main text, \*\*\* p < 0.001)
