# Supplementary material for: Comparative Study of the Genetic Diversity of Local Steppe Cattle Breeds from Russia, Kazakhstan and Kyrgyzstan by Microsatellite Analysis of Museum and Modern Samples
Source: MDPI journal article supplement (doi:10.3390/d13080351), 2021-07-30
Supplement: s1 [file s1]

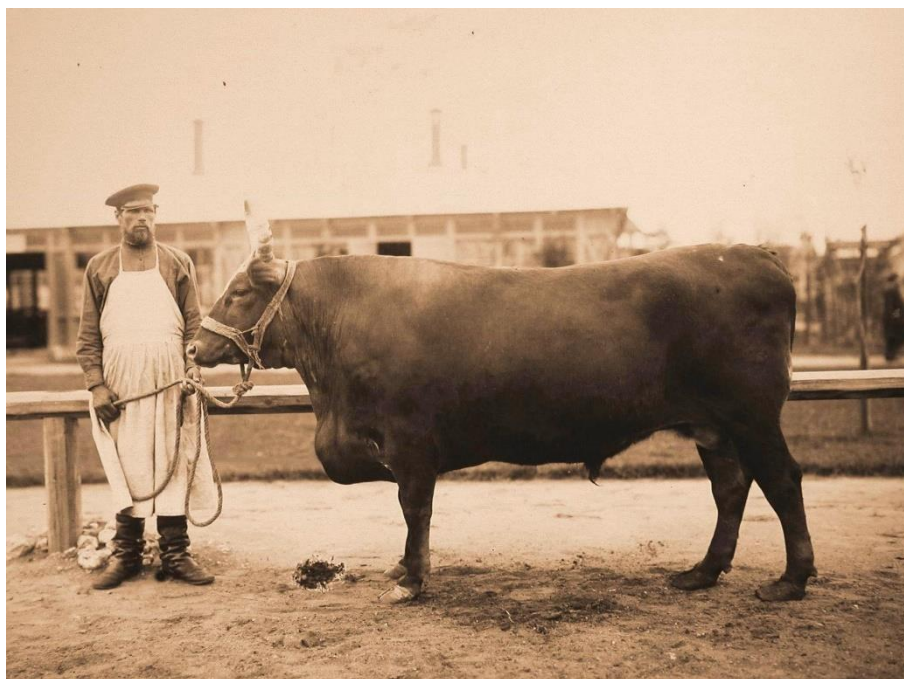

(a). Ox of the Kalmyk breed

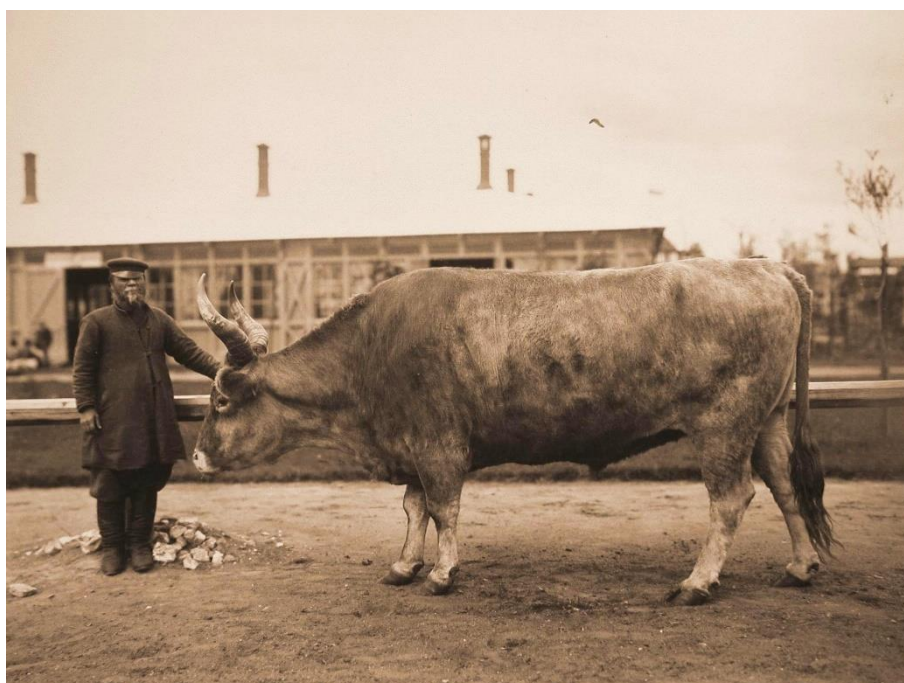

(b). Ox of the Kyrgyz breed

**Figure S1.** Representatives of Kalmyk (a) and Kyrgyz (b) cattle demonstrated on the first agricultural exhibition of breeding cattle in Moscow 1896. Available online: <https://disk.yandex.ru/a/BCyOHMV33ZQXTk> (accessed on 17.06.2021)
