# Supplementary material for: Comparative Study of the Genetic Diversity of Local Steppe Cattle Breeds from Russia, Kazakhstan and Kyrgyzstan by Microsatellite Analysis of Museum and Modern Samples
Source: MDPI journal article supplement (doi:10.3390/d13080351), 2021-07-30
Supplement: s1 [file s1]

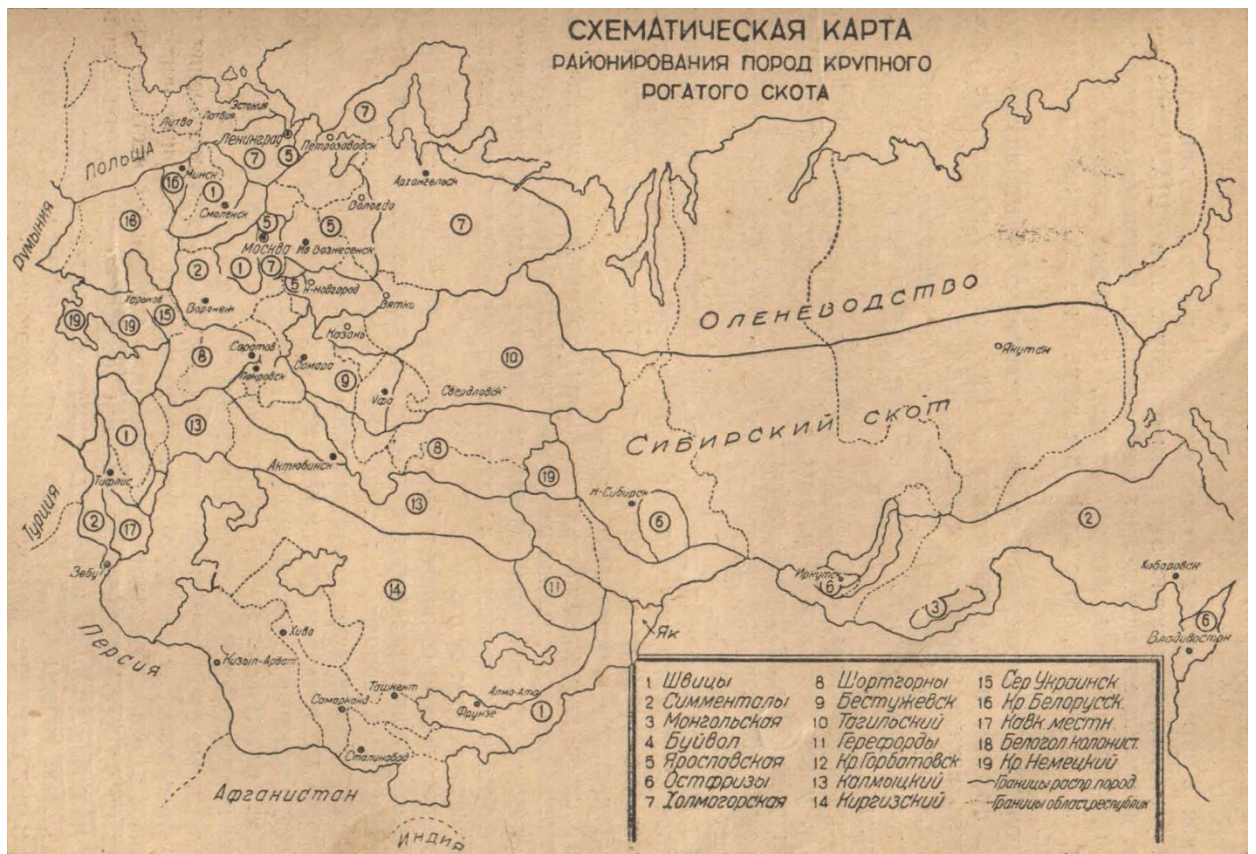

**Figure S2.** Schematic map of the zoning of cattle breeds on the territory of the USSR in 1934 [16]. Cattle breeds: 1 – Brown Swiss, 2 – Simmental, 3 – Mongolian, 4 – Buffalo, 5- Yaroslavl, 6 – Ost-Frisian, 7 – Kholmogor, 8 – Shorthorn, 9 – Bestuzhev, 10- Tagil, 11 – Hereford, 12 – Red Gorbato, **13 – Kalmyk**, **14 – Kyrgyz**, 15 – Grey Ukrainian 16 – Red Belarusian, 17 – local Caucasian, 18 – Colonized White-Headed, 19 – Red German; the boundaries of the distribution of breeds are shown by solid lines, the borders of the republics are shown by dotted lines.
