# Supplementary material for: Comparative Study of the Genetic Diversity of Local Steppe Cattle Breeds from Russia, Kazakhstan and Kyrgyzstan by Microsatellite Analysis of Museum and Modern Samples
Source: MDPI journal article supplement (doi:10.3390/d13080351), 2021-07-30
Supplement: s1 [file s1]

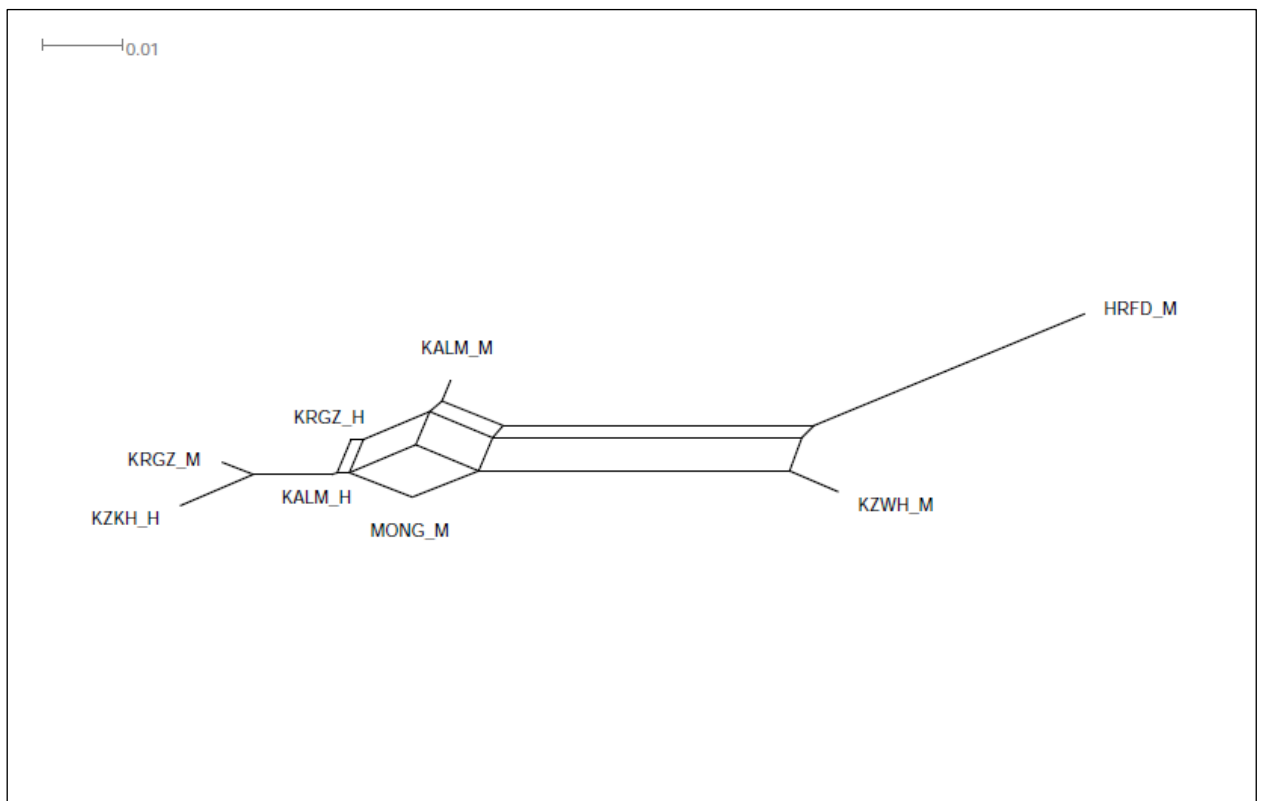

**Figure S3.** Neighbor-Net graphs based on  $F_{ST}$  genetic distances characterizing genetic relationships between studied museum and modern cattle populations. Museum populations: KALM\_H – Kalmyk, KRGZ\_H – Kyrgyz, KZKH\_H – Kazakh, modern populations: KALM\_M – Kalmyk, KRGZ\_M – Kyrgyz, KZWH\_M – Kazakh White-Headed, HRFD\_M – Hereford, MONG\_M – Mongolian cattle.
