# Supplementary material for: Comparative Study of the Genetic Diversity of Local Steppe Cattle Breeds from Russia, Kazakhstan and Kyrgyzstan by Microsatellite Analysis of Museum and Modern Samples
Source: MDPI journal article supplement (doi:10.3390/d13080351), 2021-07-30
Supplement: s1 [file s1]

**Table S4.** Alleles of microsatellites, which were occurred in museum samples, but were lost in modern populations and novel alleles, which are appeared in modern populations

| Locus   | Allele | Lost alleles |        |        | Emerged alleles |        |        |
|---------|--------|--------------|--------|--------|-----------------|--------|--------|
|         |        | KALM_H       | KRGZ_H | KZKH_H | KALM_M          | KRGZ_M | KZWH_M |
| TGLA227 | 75     | -            | -      | -      | 0.018           | -      | -      |
|         | 77     | -            | -      | -      | 0.089           | -      | 0.017  |
|         | 79     | -            | -      | -      | -               | 0.050  | 0.017  |
|         | 83     | -            | -      | -      | 0.071           | -      | 0.100  |
|         | 87     | -            | -      | -      | -               | -      | 0.067  |
|         | 93     | -            | -      | -      | -               | -      | 0.200  |
|         | 99     | -            | -      | -      | -               | 0.050  | -      |
|         | 101    | -            | 0.045  | -      | -               | -      | -      |
| BM2113  | 125    | -            | -      | -      | -               | 0.075  | 0.117  |
|         | 129    | 0.100        | -      | 0.167  | -               | -      | -      |
|         | 131    | -            | -      | -      | -               | 0.025  | -      |
|         | 133    | -            | -      | -      | -               | -      | 0.267  |
|         | 135    | -            | -      | -      | -               | -      | 0.200  |
|         | 141    | -            | -      | -      | 0.089           | 0.050  | 0.150  |
| TGLA53  | 152    | -            | -      | -      | 0.045           | -      | -      |
|         | 154    | -            | -      | -      | -               | -      | 0.117  |
|         | 156    | -            | -      | -      | 0.091           | -      | -      |
|         | 158    | -            | 0.056  | -      | -               | -      | -      |
|         | 162    | -            | -      | -      | -               | 0.050  | -      |
|         | 170    | -            | -      | -      | -               | 0.250  | -      |
|         | 172    | -            | -      | -      | -               | 0.075  | 0.267  |
|         | 174    | -            | -      | -      | 0.023           | -      | -      |
|         | 178    | -            | -      | -      | -               | 0.025  | -      |
|         | 182    | 0.100        | 0.056  | -      | -               | -      | -      |
|         | 186    | -            | -      | -      | 0.045           | -      | -      |
| ETH10   | 209    | -            | -      | -      | -               | 0.025  | -      |
|         | 215    | -            | -      | -      | 0.036           | -      | -      |
|         | 223    | -            | -      | -      | 0.054           | -      | -      |
|         | 225    | -            | 0.045  | -      | -               | -      | -      |
| SPS115  | 250    | -            | -      | -      | -               | 0.025  | -      |
|         | 252    | -            | -      | -      | 0.054           | -      | 0.133  |
|         | 254    | -            | -      | -      | -               | -      | 0.083  |
|         | 258    | -            | -      | -      | -               | 0.050  | -      |
|         | 260    | -            | -      | -      | -               | -      | 0.250  |
|         | 262    | -            | -      | -      | -               | 0.025  | 0.050  |
| TGLA122 | 137    | -            | -      | -      | 0.054           | -      | -      |
|         | 139    | -            | -      | -      | -               | -      | 0.017  |
|         | 141    | -            | -      | -      | 0.018           | -      | 0.017  |
|         | 145    | -            | -      | -      | -               | 0.075  | -      |
|         | 149    | -            | -      | -      | -               | 0.050  | 0.017  |
|         | 153    | -            | -      | -      | 0.054           | -      | -      |
|         | 161    | -            | -      | -      | -               | -      | 0.317  |

|         |     |       |        |       |       |       |       |
|---------|-----|-------|--------|-------|-------|-------|-------|
|         | 163 | -     | -      | -     | -     | 0.025 | -     |
|         | 165 | 0.050 | -      | -     | -     | -     | -     |
|         | 167 | -     | 0.045  | -     | -     | -     | -     |
|         | 169 | -     | -      | -     | -     | -     | 0.033 |
|         | 173 | -     | -      | 0.167 | -     | -     | -     |
|         | 179 | -     | -      | -     | -     | 0.075 | -     |
|         | 183 | -     | -      | -     | -     | -     | 0.100 |
| INRA23  | 200 | -     | -      | 0.167 | -     | -     | -     |
|         | 208 | -     | -      | -     | -     | -     | 0.050 |
|         | 210 | -     | -      | -     | 0.071 | -     | 0.017 |
|         | 212 | -     | -      | -     | -     | -     | 0.033 |
|         | 214 | -     | -      | -     | -     | -     | 0.700 |
|         | 216 | 0.050 | -      | -     | -     | -     | -     |
|         | 218 | -     | -      | -     | 0.018 | -     | -     |
| TGLA126 | 107 | -     | 0.045  | -     | -     | -     | -     |
|         | 119 | -     | -      | -     | 0.058 | 0.100 | 0.050 |
|         | 123 | -     | -      | -     | -     | -     | 0.067 |
|         | 125 | -     | -      | -     | -     | 0.025 | -     |
| BM1818  | 256 | 0.050 | -      | -     | -     | -     | -     |
|         | 258 | -     | -      | -     | 0.143 | 0.050 | -     |
|         | 264 | -     | -      | -     | -     | 0.050 | 0.033 |
|         | 268 | -     | -      | -     | -     | 0.025 | -     |
|         | 272 | -     | -      | -     | -     | 0.025 | 0.017 |
|         | 274 | -     | 0.0625 | -     | -     | -     | -     |
| ETH225  | 140 | -     | -      | -     | -     | 0.075 | 0.267 |
|         | 142 | -     | -      | -     | -     | 0.025 | 0.017 |
|         | 146 | -     | -      | -     | -     | -     | 0.367 |
|         | 146 | 0.100 | -      | -     | -     | -     | -     |
|         | 148 | -     | -      | -     | -     | -     | 0.117 |
|         | 152 | 0.050 | -      | -     | -     | -     | -     |
| BM1824  | 184 | -     | -      | -     | -     | 0.025 | -     |
|         | 186 | -     | -      | -     | 0.054 | -     | -     |
|         | 190 | -     | -      | -     | 0.018 | 0.050 | -     |

Notes: Locus – locus of microsatellite, Allele – allele of microsatellites, lost alleles – alleles, which were present in museum samples but were lost in modern populations, emerged alleles – novel alleles which are appeared in modern populations, museum populations: KALM\_H – Kalmyk, KRGZ\_H – Kyrgyz, KZKH\_H – Kazakh, modern populations: KALM\_M – Kalmyk, KRGZ\_M – Kyrgyz, KZWH\_M – Kazakh White-Headed.
