# Supplementary material for: Comparative Study of the Genetic Diversity of Local Steppe Cattle Breeds from Russia, Kazakhstan and Kyrgyzstan by Microsatellite Analysis of Museum and Modern Samples
Source: MDPI journal article supplement (doi:10.3390/d13080351), 2021-07-30
Supplement: s1 [file s1]

**Table S5.** Genetic distances between the studied populations based on  $F_{ST}$  and Jost's D indices.

| Populations | KALM_<br>H | KRGZ_<br>H | KZKH_<br>H | KALM_<br>M | KRGZ_<br>M | KZWH_<br>M | HRFD_<br>M | MONG_<br>M |
|-------------|------------|------------|------------|------------|------------|------------|------------|------------|
| KALM_H      | -          | 0          | -0.020     | 0.018      | 0.010      | 0.048      | 0.088      | 0.003      |
| KRGZ_H      | 0          | -          | 0.024      | 0.020      | 0.025      | 0.082      | 0.090      | 0          |
| KZKH_H      | -0.013     | 0.008      | -          | 0.043      | 0.014      | 0.096      | 0.154      | 0.019      |
| KALM_M      | 0.017      | 0.023      | 0.004      | -          | 0.028      | 0.062      | 0.085      | 0.026      |
| KRGZ_M      | 0.005      | 0.047      | -0.004     | 0.041      | -          | 0.069      | 0.118      | 0.033      |
| KZWH_M      | 0.089      | 0.175      | 0.079      | 0.120      | 0.095      | -          | 0.049      | 0.052      |
| HRFD_M      | 0.144      | 0.124      | 0.155      | 0.176      | 0.163      | 0.079      | -          | 0.067      |
| MONG_M      | 0.004      | 0          | 0.015      | 0.039      | 0.053      | 0.098      | 0.122      | -          |

Notes: museum populations: KALM\_H – Kalmyk, KRGZ\_H – Kyrgyz, KZKH\_H – Kazakh, modern populations: KALM\_M – Kalmyk, KRGZ\_M – Kyrgyz, KZWH\_M – Kazakh White-Headed, HRFD\_M – Hereford, MONG\_M – Mongolian cattle;  $F_{ST}$  values are presented above the diagonal; Jost's D values are presented below the diagonal.
